# Supplementary material
Source: PubMed Central journal article supplement (PMC7539675)
Supplement: ehp7195.smcontents.508.pdf [file ehp7195.smcontents.508.pdf]

**Note to readers with disabilities:** *EHP* strives to ensure that all journal content is accessible to all readers. However, some figures and Supplemental Material published in *EHP* articles may not conform to [508 standards](#) due to the complexity of the information being presented. If you need assistance accessing journal content, please contact [ehp508@niehs.nih.gov](mailto:ehp508@niehs.nih.gov). Our staff will work with you to assess and meet your accessibility needs within 3 working days.

### **Supplemental Material**

#### **Trimester-Specific Blood Trihalomethane and Urinary Haloacetic Acid Concentrations and Adverse Birth Outcomes: Identifying Windows of Vulnerability during Pregnancy**

Yang Sun, Yi-Xin Wang, Chong Liu, Ying-Jun Chen, Wen-Qing Lu, and Carmen Messerlian

#### **Table of Contents**

**Table S1.** Sensitivity analysis for associations between blood trihalomethane and urinary haloacetic acid concentrations (tertiles or categories) and risk of small for gestational age by pregnancy trimesters, excluding women reporting occupational exposures to organic/chlorinated solvents.

**Table S2.** Sensitivity analysis for associations between blood trihalomethane and urinary haloacetic acid concentrations (tertiles or categories) and risk of small for gestational age by pregnancy trimesters, with adjustment for both pre-pregnancy BMI and trimester-specific weight gain.

**Table S3.** Associations between blood trihalomethane and urinary haloacetic acid concentrations (tertiles or categories) and risk of low birthweight by pregnancy trimesters.

**Table S4.** Associations between blood trihalomethane and urinary haloacetic acid concentrations (tertiles or categories) and risk of preterm birth by pregnancy trimesters.

**Table S5.** Sensitivity analysis for associations between urinary haloacetic acid concentrations (tertiles or categories) and risk of small for gestational age, low birthweight, and preterm birth, restricting the analysis among women who had a normal range of urinary creatinine (i.e., >0.3 to <3 g/L).

**Table S6.** Sensitivity analysis for associations between urinary haloacetic acid concentrations (tertiles or categories) and risk of small for gestational age, low birthweight, and preterm birth, using SG-corrected concentrations to correct for urine dilution.

**Table S7.** Proportion of adverse birth outcomes of included versus excluded women due to missing measurements of blood THMs during the third trimester.
